# Supplementary material for: Targeting thrombogenicity and inflammation in chronic HIV infection
Source: PubMed Central journal article supplement — Sci Adv. 2019 Jun 12;5(6):eaav5463. doi: 10.1126/sciadv.aav5463 (PMC6561747; doi:10.1126/sciadv.aav5463), 2019-06-12
Supplement: aav5463_SM.pdf [file aav5463_SM.pdf]

## Supplementary Materials for

### Targeting thrombogenicity and inflammation in chronic HIV infection

Meagan P. O'Brien, M. Urooj Zafar\*, Jose C. Rodriguez, Ibeawuchi Okoroafor, Alex Heyison, Karen Cavanagh, Gabriela Rodriguez-Caprio, Alan Weinberg, Gines Escolar, Judith A. Aberg, Juan J. Badimon

\*Corresponding author. Email: urooj.zafar@mssm.edu

Published 12 June 2019, *Sci. Adv.* **5**, eaav5463 (2019)  
DOI: 10.1126/sciadv.aav5463

#### This PDF file includes:

Table S1. Thrombus size [median (IQR)  $\mu\text{m}^2/\text{mm}$ ] of PWH versus seronegative controls: Subgroup analyses.

Table S2. Coagulation parameters [median (IQR)] of PWH versus seronegative controls: Gender analyses.

Table S3. Correlation of high-shear thrombus with parameters of inflammation and thrombosis in PWH versus seronegative controls.

**Table S1. Thrombus size [median (IQR)  $\mu\text{m}^2/\text{mm}$ ] of PWH versus seronegative controls: Subgroup analyses.**

|                                              | Seronegative<br>Controls | Participants<br>with HIV | P value      |
|----------------------------------------------|--------------------------|--------------------------|--------------|
| <u>All patients:</u> n                       | 14                       | 15                       |              |
| Low-shear thrombus size                      | 5237 (1929)              | 6349 (1547)              | <b>0.006</b> |
| High-shear thrombus size                     | 7421 (3513)              | 9255 (3192)              | <b>0.013</b> |
| <u>Excluding current smokers:</u> n          | 12                       | 11                       |              |
| Low-shear thrombus size                      | 5009 (1717)              | 6349 (1279)              | <b>0.001</b> |
| High-shear thrombus size                     | 7374 (3362)              | 9885 (4319)              | <b>0.002</b> |
| <u>Excluding current and past smokers:</u> n | 11                       | 7                        |              |
| Low-shear thrombus size                      | 5200 (1579)              | 6819 (1326)              | <b>0.001</b> |
| High-shear thrombus size                     | 7421 (2755)              | 9885 (5205)              | <b>0.011</b> |
| <u>Excluding patients on abacavir:</u> n     | 14                       | 13                       |              |
| Low-shear thrombus size                      | 5237 (1929)              | 6743 (1437)              | <b>0.003</b> |
| High-shear thrombus size                     | 7421 (3513)              | 9630 (3791)              | <b>0.008</b> |

**Table S2. Coagulation parameters [median (IQR)] of PWH versus seronegative controls: Gender analyses.**

|                                | Seronegative<br>Controls | Participants<br>with HIV | Difference | P<br>value |
|--------------------------------|--------------------------|--------------------------|------------|------------|
| <u>All patients: n</u>         | 14                       | 15                       |            |            |
| Coagulation time (CT), sec     | 168.5 (20)               | 161.0 (17)               | ↓4.5%      | 0.257      |
| Clot Formation Time (CFT), sec | 66.0 (24)                | 63.0 (35)                | ↓4.5%      | 0.328      |
| Max. Clot Firmness (MCF), mm   | 61.5 (6)                 | 62 (10)                  | ↑0.8%      | 0.780      |
| <u>Females: n</u>              | 7                        | 7                        |            |            |
| Coagulation time (CT), sec     | 171.0 (23)               | 153.0 (32)               | ↓10.5%     | 0.450      |
| Clot Formation Time (CFT), sec | 63.0 (11)                | 50.0 (19)                | ↓20.6%     | 0.076      |
| Max. Clot Firmness (MCF), mm   | 64.0 (4)                 | 67 (6)                   | ↑4.7%      | 0.292      |
| <u>Males: n</u>                | 7                        | 8                        |            |            |
| Coagulation time (CT), sec     | 164 (21)                 | 161.5 (15)               | ↓1.5%      | 0.435      |
| Clot Formation Time (CFT), sec | 71.0 (48)                | 74.5 (31)                | ↑4.9%      | 0.745      |
| Max. Clot Firmness (MCF), mm   | 60.0 (7)                 | 57.5 (6)                 | ↑4.2%      | 0.829      |

**Table S3. Correlation of high-shear thrombus with parameters of inflammation and thrombosis in PWH versus seronegative controls.**

|                                | Seronegative Controls |         | Participants<br>with HIV |              |
|--------------------------------|-----------------------|---------|--------------------------|--------------|
|                                | Pearson r             | P value | Pearson r                | P value      |
| <u>High shear thrombus vs.</u> |                       |         |                          |              |
| D-dimer                        | -0.222                | 0.465   | 0.672                    | <b>0.017</b> |
| sTNFR1                         | -0.328                | 0.274   | 0.746                    | <b>0.005</b> |
| sTNFR2                         | 0.242                 | 0.426   | 0.607                    | <b>0.037</b> |
| Classical monocytes            | 0.561                 | 0.073   | -0.707                   | <b>0.005</b> |
| Non-classical monocytes        | -0.259                | 0.442   | 0.621                    | <b>0.031</b> |
| sCD14                          | 0.298                 | 0.347   | 0.230                    | 0.472        |
